# Supplementary material
Source: PubMed Central journal article supplement (PMC7140589)
Supplement: 11427_2020_1688_MOESM1_ESM.pdf [file 11427_2020_1688_MOESM1_ESM.pdf]

1 **SUPPORTING INFORMATION**

2 **I**

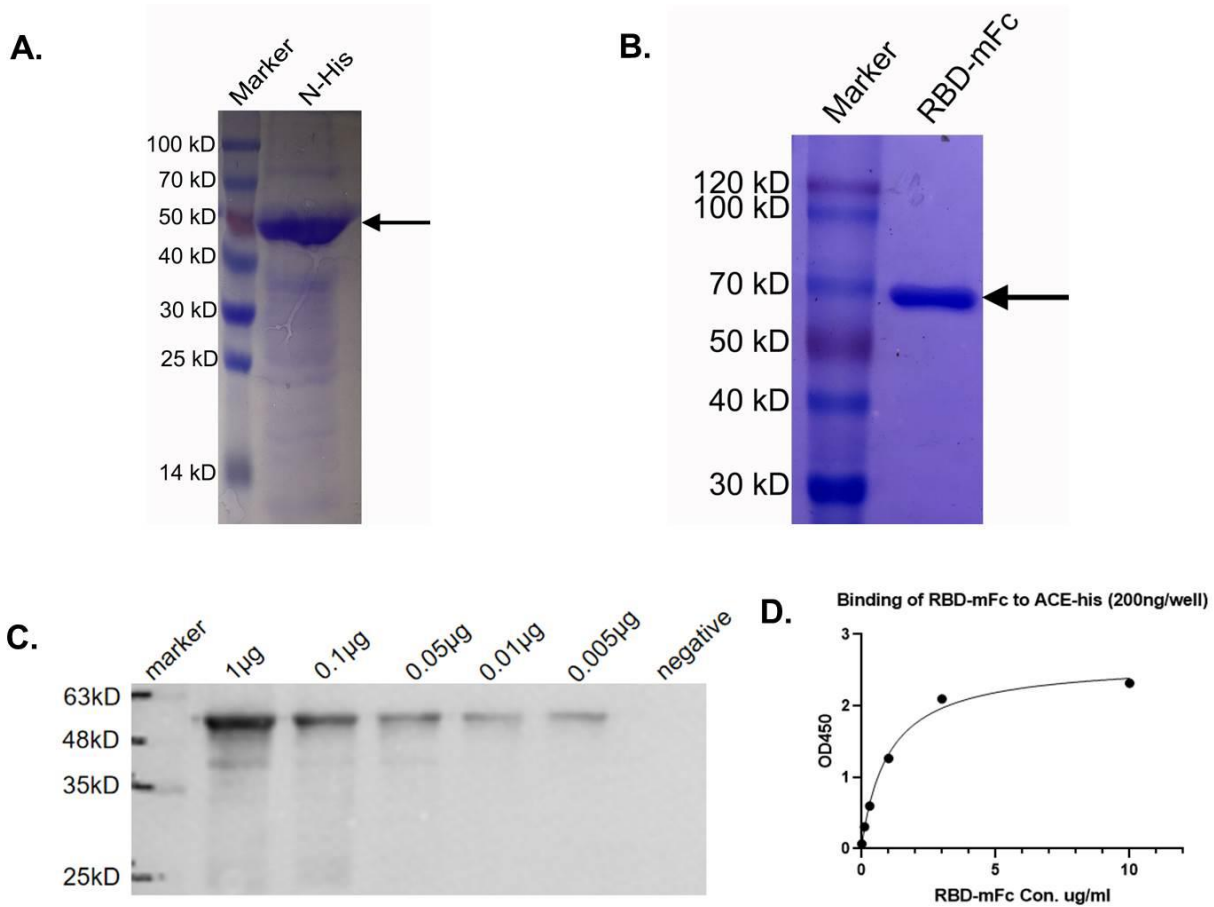

3

4 **Figure S1. SDS-PAGE analysis and Western blot of the N protein, the RBD of the S protein,**

5 **and the binding curve of the RBD-mFc to human ACE2.** (A) SDS-PAGE analysis of the N

6 protein. Second lane from the left: The N protein with a His tag. (B) SDS-PAGE analysis of

7 RBD of the S protein. Second lane from the left: RBD of the S protein with a mouse Fc tag. (C)

8 The N protein tested by Western blot. The N protein was diluted into different concentrations to

9 avoid false positive results. The serum samples from normal controls were used as negative

10 controls. (D) The binding curve of RBD-mFc to human ACE2. The  $A_{450}$  boosted with the

11 increase in the concentration of the RBD-mFc expressed by our method.

12

13

14

15

16

17 **Table S1 Demography and clinical classification of COVID-19 patients.**

| <b>Name</b> | <b>Sex</b> | <b>Age</b> | <b>Date of onset</b> | <b>Date of sampling</b> | <b>Clinical classification</b> |
|-------------|------------|------------|----------------------|-------------------------|--------------------------------|
| patient 1   | F          | 45         | 2020/1/26            | 2020/2/01               | moderate                       |
| patient 2   | F          | 59         | 2020/1/25            | 2020/2/01               | moderate                       |
| patient 3   | F          | 62         | 2020/1/26            | 2020/2/01               | moderate                       |
| patient 4   | M          | 34         | 2020/1/22            | 2020/2/10               | moderate                       |
| patient 5   | F          | 39         | 2020/1/23            | 2020/2/10               | moderate                       |
| patient 6   | F          | 48         | 2020/1/24            | 2020/2/10               | moderate                       |
| patient 7   | F          | 49         | 2020/1/23            | 2020/2/10               | moderate                       |
| patient 8   | F          | 67         | 2020/1/15            | 2020/2/10               | moderate                       |
| patient 9   | F          | 42         | 2020/1/20            | 2020/2/10               | moderate                       |
| patient 10  | F          | 52         | 2020/1/23            | 2020/2/10               | severe                         |
| patient 11  | F          | 63         | 2020/1/22            | 2020/1/28               | mild                           |
| patient 12  | F          | 65         | 2020/1/23            | 2020/1/28               | severe                         |
| patient 13  | M          | 50         | 2020/1/21            | 2020/1/28               | critical                       |
| patient 14  | F          | 49         | 2020/2/10            | 2020/2/11               | severe                         |
| patient 15  | F          | 63         | 2020/1/22            | 2020/2/03               | mild                           |
| patient 16  | M          | 50         | 2020/1/21            | 2020/2/15               | critical                       |
| patient 17  | M          | 50         | 2020/1/21            | 2020/1/31               | critical                       |
| patient 18  | F          | 49         | 2020/2/10            | 2020/2/17               | severe                         |
| patient 19  | M          | 32         | 2020/1/26            | 2020/2/20               | mild                           |
| patient 20  | F          | 48         | 2020/2/09            | 2020/2/20               | mild                           |
| patient 21  | F          | 52         | 2020/2/12            | 2020/2/20               | mild                           |
| patient 22  | M          | 45         | 2020/2/13            | 2020/2/20               | mild                           |
| patient 23  | F          | 41         | 2020/2/09            | 2020/2/20               | mild                           |
| patient 24  | M          | 45         | 2020/1/31            | 2020/2/20               | severe                         |
| patient 25  | M          | 55         | 2020/1/31            | 2020/2/20               | mild                           |
| patient 26  | M          | 45         | 2020/2/05            | 2020/2/20               | mild                           |
| patient 27  | M          | 25         | 2020/2/01            | 2020/2/20               | mild                           |
| patient 28  | F          | 49         | 2020/2/08            | 2020/2/20               | mild                           |
| patient 29  | F          | 52         | 2020/2/04            | 2020/2/20               | mild                           |
| patient 30  | F          | 49         | 2020/1/31            | 2020/2/20               | mild                           |
| patient 31  | F          | 82         | 2020/2/12            | 2020/2/20               | mild                           |
| patient 32  | F          | 56         | 2020/2/01            | 2020/2/20               | mild                           |
| patient 33  | F          | 63         | 2020/1/31            | 2020/2/20               | mild                           |
| patient 34  | F          | 65         | 2020/1/24            | 2020/2/20               | mild                           |
| patient 35  | F          | 30         | 2020/2/06            | 2020/2/20               | mild                           |
| patient 36  | F          | 65         | 2020/2/01            | 2020/2/20               | mild                           |
| patient 37  | M          | 65         | 2020/2/02            | 2020/2/20               | mild                           |
| patient 38  | M          | 30         | 2020/2/12            | 2020/2/20               | mild                           |
| patient 39  | M          | 26         | 2020/1/23            | 2020/2/21               | moderate                       |
| patient 40  | F          | 56         | 2020/2/11            | 2020/2/21               | moderate                       |
| patient 41  | F          | 33         | 2020/1/26            | 2020/2/21               | moderate                       |
| patient 42  | M          | 33         | 2020/2/11            | 2020/2/21               | critical                       |
| patient 43  | F          | 18         | 2020/2/01            | 2020/2/21               | mild                           |
| patient 44  | M          | 43         | 2020/1/27            | 2020/2/21               | severe                         |
| patient 45  | F          | 20         | 2020/2/05            | 2020/2/21               | moderate                       |
| patient 46  | F          | 73         | 2020/2/05            | 2020/2/21               | moderate                       |
| patient 47  | M          | 34         | 2020/1/23            | 2020/2/21               | critical                       |

18

19
